# Supplementary material
Source: publisher site journal article supplement (https://www.dovepress.com/get_supplementary_file.php?f=216745-S4.xlsx)
Supplement: Supplementary file 1 [file get_supplementary_file.php]

## Sheet: SV.all.stat
Table.S4 Structural Variations(SVs) statistics for 10 A. baumannii isolates by whole-genome resequencing
	MDR-CQA	MDR-CQB	MDR-CQC	MDR-CQD	MDR-CQE	MDR-CQF	MDR-CQG	MDR-CQH	MDR-CQI	MDR-CQJ
SV	34	9	1	8	37	28	0	2	44	4
INS	15	2	0	1	11	7	0	0	14	0
DEL	18	6	1	6	19	18	0	0	20	4
INV	1	0	0	0	3	1	0	0	3	0
ITX	0	1	0	1	4	2	0	2	7	0
